# Supplementary material for: A single 9-mesityl-10-methylacridinium ion as a solvatochromic sensor array for multicolor visual discrimination of solvents
Source: Royal Society of Chemistry journal article supplement (doi:10.1039/c9an01225g), 2019-01-01
Supplement: c9an01225g1.pdf [file c9an01225g1.pdf]

## Supporting information

### **A single 9-Mesityl-10-Methylacridinium ion as solvatochromic sensor array for multicolor visual discrimination of solvents**

Jiayan Du <sup>a</sup>, Yuequan Deng <sup>a</sup>, Yi He <sup>\*b</sup>

<sup>a</sup> School of Materials Science and Engineering, Southwest University of Science and Technology, Mianyang, 621010, P. R. China.

<sup>b</sup> School of National Defense Science & Technology, Southwest University of Science and Technology, Mianyang, 621010, P. R. China.

\*Corresponding author: Prof. Dr. Yi He, Tel: +86-816-6089885, Fax: +86-816-6089889,  
Email: yhe2014@126.com.

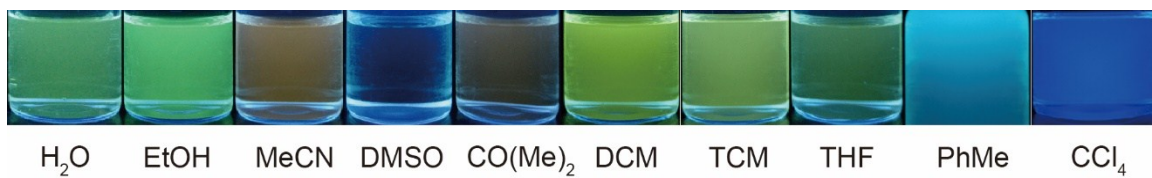

**Fig. S1** The initial fluorescent images of Acr<sup>+</sup>-Mes in different solvents under 365 nm ultraviolet excitation.

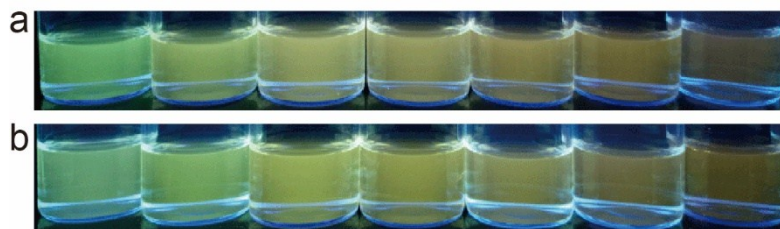

**Fig. S2** The initial optical images of binary solvent mixtures with different volume ratios (left to right: 100:0, 80:20, 60:40, 50:50, 40:60, 20:80, and 0:100) under 365 nm ultraviolet excitation: a) DCM and MeCN, b) TCM and MeCN.

**Table S1.** Training matrix of the response patterns against various solvents based on RGB values.

| Solvents         | R   | G   | B   |
|------------------|-----|-----|-----|
| H <sub>2</sub> O | 58  | 129 | 86  |
| H <sub>2</sub> O | 62  | 126 | 89  |
| H <sub>2</sub> O | 58  | 129 | 99  |
| H <sub>2</sub> O | 56  | 120 | 96  |
| H <sub>2</sub> O | 60  | 121 | 87  |
| EtOH             | 61  | 166 | 100 |
| EtOH             | 60  | 167 | 97  |
| EtOH             | 61  | 170 | 103 |
| EtOH             | 63  | 165 | 99  |
| EtOH             | 57  | 167 | 96  |
| MeCN             | 171 | 164 | 120 |
| MeCN             | 177 | 159 | 119 |
| MeCN             | 172 | 160 | 120 |
| MeCN             | 172 | 155 | 112 |
| MeCN             | 170 | 155 | 112 |
| DMSO             | 14  | 22  | 41  |
| DMSO             | 10  | 21  | 43  |

---

|                     |     |     |     |
|---------------------|-----|-----|-----|
| DMSO                | 10  | 21  | 41  |
| DMSO                | 15  | 21  | 47  |
| DMSO                | 11  | 18  | 44  |
| CO(Me) <sub>2</sub> | 133 | 128 | 88  |
| CO(Me) <sub>2</sub> | 131 | 128 | 83  |
| CO(Me) <sub>2</sub> | 132 | 129 | 88  |
| CO(Me) <sub>2</sub> | 130 | 124 | 88  |
| CO(Me) <sub>2</sub> | 127 | 123 | 86  |
| DCM                 | 166 | 209 | 130 |
| DCM                 | 161 | 206 | 125 |
| DCM                 | 169 | 209 | 123 |
| DCM                 | 166 | 205 | 124 |
| DCM                 | 167 | 208 | 129 |
| TCM                 | 106 | 175 | 120 |
| TCM                 | 108 | 179 | 121 |
| TCM                 | 109 | 180 | 120 |
| TCM                 | 111 | 180 | 125 |
| TCM                 | 106 | 180 | 119 |
| THF                 | 84  | 162 | 104 |
| THF                 | 82  | 157 | 100 |

---

---

|                  |    |     |     |
|------------------|----|-----|-----|
| THF              | 81 | 159 | 101 |
| THF              | 85 | 160 | 101 |
| THF              | 84 | 160 | 98  |
| PhMe             | 38 | 164 | 179 |
| PhMe             | 41 | 167 | 181 |
| PhMe             | 32 | 159 | 174 |
| PhMe             | 39 | 166 | 183 |
| PhMe             | 36 | 162 | 177 |
| CCl <sub>4</sub> | 0  | 94  | 224 |
| CCl <sub>4</sub> | 2  | 94  | 227 |
| CCl <sub>4</sub> | 3  | 98  | 228 |
| CCl <sub>4</sub> | 0  | 92  | 226 |
| CCl <sub>4</sub> | 0  | 93  | 227 |

---

**Table S2.** Identification of unknown samples

| Sample no. | R   | G   | B   | Identification      | Verification |
|------------|-----|-----|-----|---------------------|--------------|
| 1          | 176 | 162 | 117 | MeCN                | Yes          |
| 2          | 107 | 176 | 119 | TCM                 | Yes          |
| 3          | 85  | 163 | 103 | THF                 | Yes          |
| 4          | 165 | 207 | 131 | DCM                 | Yes          |
| 5          | 1   | 94  | 223 | CCl <sub>4</sub>    | Yes          |
| 6          | 2   | 90  | 223 | CCl <sub>4</sub>    | Yes          |
| 7          | 14  | 21  | 47  | DMSO                | Yes          |
| 8          | 172 | 157 | 116 | MeCN                | Yes          |
| 9          | 42  | 165 | 183 | PhMe                | Yes          |
| 10         | 129 | 124 | 86  | CO(Me) <sub>2</sub> | Yes          |
| 11         | 42  | 163 | 182 | PhMe                | Yes          |
| 12         | 62  | 125 | 94  | H <sub>2</sub> O    | Yes          |
| 13         | 9   | 21  | 45  | DMSO                | Yes          |
| 14         | 175 | 158 | 115 | MeCN                | Yes          |
| 15         | 55  | 168 | 104 | EtOH                | Yes          |
| 16         | 165 | 210 | 127 | DCM                 | Yes          |
| 17         | 164 | 208 | 133 | DCM                 | Yes          |
| 18         | 40  | 159 | 181 | PhMe                | Yes          |

---

|    |     |     |     |                     |     |
|----|-----|-----|-----|---------------------|-----|
| 19 | 3   | 91  | 224 | CCl <sub>4</sub>    | Yes |
| 20 | 111 | 180 | 125 | TCM                 | Yes |
| 21 | 60  | 169 | 102 | EtOH                | Yes |
| 22 | 43  | 160 | 180 | PhMe                | Yes |
| 23 | 87  | 160 | 105 | THF                 | Yes |
| 24 | 81  | 158 | 102 | THF                 | Yes |
| 25 | 107 | 177 | 117 | TCM                 | Yes |
| 26 | 132 | 127 | 89  | CO(Me) <sub>2</sub> | Yes |
| 27 | 62  | 167 | 101 | EtOH                | Yes |
| 28 | 170 | 165 | 115 | MeCN                | Yes |
| 29 | 39  | 160 | 177 | PhMe                | Yes |
| 30 | 124 | 125 | 83  | CO(Me) <sub>2</sub> | Yes |
| 31 | 160 | 203 | 123 | DCM                 | Yes |
| 32 | 59  | 170 | 102 | EtOH                | Yes |
| 33 | 109 | 179 | 119 | TCM                 | Yes |
| 34 | 54  | 120 | 92  | H <sub>2</sub> O    | Yes |
| 35 | 135 | 130 | 90  | CO(Me) <sub>2</sub> | Yes |
| 36 | 82  | 159 | 103 | THF                 | Yes |
| 37 | 12  | 24  | 46  | DMSO                | Yes |
| 38 | 173 | 160 | 118 | MeCN                | Yes |

---



---

|    |     |     |     |                     |     |
|----|-----|-----|-----|---------------------|-----|
| 39 | 2   | 95  | 226 | CCl <sub>4</sub>    | Yes |
| 40 | 58  | 167 | 102 | EtOH                | Yes |
| 41 | 57  | 126 | 97  | H <sub>2</sub> O    | Yes |
| 42 | 165 | 210 | 129 | DCM                 | Yes |
| 43 | 11  | 21  | 46  | DMSO                | Yes |
| 44 | 108 | 178 | 116 | TCM                 | Yes |
| 45 | 128 | 124 | 87  | CO(Me) <sub>2</sub> | Yes |
| 46 | 45  | 161 | 184 | PhMe                | Yes |
| 47 | 57  | 116 | 88  | H <sub>2</sub> O    | Yes |
| 48 | 84  | 161 | 107 | THF                 | Yes |
| 49 | 175 | 163 | 123 | MeCN                | Yes |
| 50 | 12  | 21  | 50  | DMSO                | Yes |
| 51 | 58  | 122 | 96  | H <sub>2</sub> O    | Yes |
| 52 | 64  | 123 | 91  | H <sub>2</sub> O    | Yes |
| 53 | 178 | 164 | 125 | MeCN                | Yes |
| 54 | 2   | 97  | 227 | CCl <sub>4</sub>    | Yes |
| 55 | 114 | 183 | 126 | TCM                 | Yes |
| 56 | 132 | 124 | 87  | CO(Me) <sub>2</sub> | Yes |
| 57 | 41  | 162 | 181 | PhMe                | Yes |
| 58 | 106 | 177 | 117 | TCM                 | Yes |

---

---

|    |     |     |     |                     |     |
|----|-----|-----|-----|---------------------|-----|
| 59 | 60  | 166 | 100 | EtOH                | Yes |
| 60 | 1   | 94  | 225 | CCl <sub>4</sub>    | Yes |
| 61 | 10  | 25  | 48  | DMSO                | Yes |
| 62 | 165 | 209 | 132 | DCM                 | Yes |
| 63 | 84  | 161 | 105 | THF                 | Yes |
| 64 | 55  | 124 | 95  | H <sub>2</sub> O    | Yes |
| 65 | 43  | 169 | 183 | PhMe                | Yes |
| 66 | 161 | 205 | 128 | DCM                 | Yes |
| 67 | 80  | 164 | 104 | THF                 | Yes |
| 68 | 1   | 93  | 226 | CCl <sub>4</sub>    | Yes |
| 69 | 109 | 183 | 124 | TCM                 | Yes |
| 70 | 56  | 164 | 102 | EtOH                | Yes |
| 71 | 61  | 166 | 107 | EtOH                | Yes |
| 72 | 163 | 212 | 131 | DCM                 | Yes |
| 73 | 128 | 120 | 83  | CO(Me) <sub>2</sub> | Yes |
| 74 | 175 | 159 | 125 | MeCN                | Yes |
| 75 | 2   | 95  | 226 | CCl <sub>4</sub>    | Yes |
| 76 | 62  | 129 | 98  | H <sub>2</sub> O    | Yes |
| 77 | 111 | 180 | 126 | TCM                 | Yes |
| 78 | 129 | 123 | 87  | CO(Me) <sub>2</sub> | Yes |

---

---

|    |     |     |     |                     |     |
|----|-----|-----|-----|---------------------|-----|
| 79 | 13  | 25  | 47  | DMSO                | Yes |
| 80 | 43  | 173 | 186 | PhMe                | Yes |
| 81 | 12  | 23  | 43  | DMSO                | Yes |
| 82 | 83  | 158 | 99  | THF                 | Yes |
| 83 | 177 | 159 | 119 | MeCN                | Yes |
| 84 | 136 | 122 | 87  | CO(Me) <sub>2</sub> | Yes |
| 85 | 166 | 210 | 133 | DCM                 | Yes |
| 86 | 86  | 164 | 104 | THF                 | Yes |
| 87 | 62  | 125 | 98  | H <sub>2</sub> O    | Yes |
| 88 | 111 | 182 | 124 | TCM                 | Yes |
| 89 | 0   | 91  | 224 | CCl <sub>4</sub>    | Yes |
| 90 | 60  | 123 | 92  | H <sub>2</sub> O    | Yes |
| 91 | 55  | 166 | 100 | EtOH                | Yes |
| 92 | 170 | 157 | 113 | MeCN                | Yes |
| 93 | 10  | 18  | 51  | DMSO                | Yes |
| 94 | 43  | 169 | 184 | PhMe                | Yes |
| 95 | 79  | 161 | 99  | THF                 | Yes |
| 96 | 55  | 164 | 97  | EtOH                | Yes |
| 97 | 134 | 120 | 81  | CO(Me) <sub>2</sub> | Yes |
| 98 | 0   | 94  | 225 | CCl <sub>4</sub>    | Yes |

---

---

|     |     |     |     |      |     |
|-----|-----|-----|-----|------|-----|
| 99  | 163 | 207 | 130 | DCM  | Yes |
| 100 | 13  | 20  | 48  | DMSO | Yes |

---
